# Supplementary material
Source: PubMed Central journal article supplement (PMC4962626)
Supplement: IAI.00350-16_zii999091778so1.pdf [file IAI.00350-16_zii999091778so1.pdf]

1 Supplemental Figure

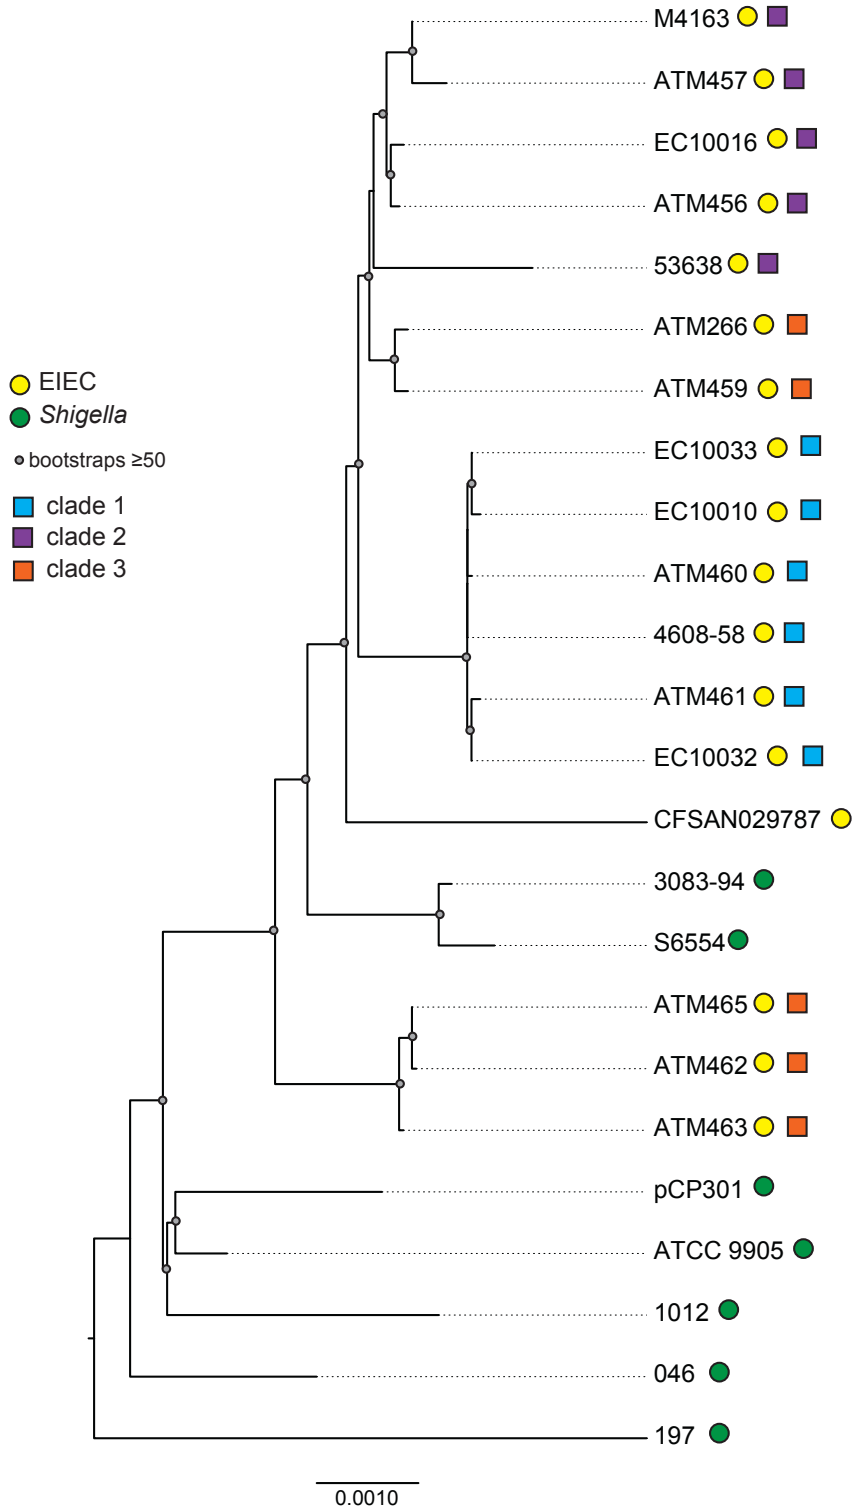

2  
3

4 **Figure S1. Virulence plasmid phylogeny.** The *Shigella* virulence plasmid, pCP301  
5 (NC\_004851.1), was aligned to the EIEC and *Shigella* genomes that contained genes  
6 that exhibited similarity to those on the plasmid. The alignment was performed using  
7 Mugsy (1) and the regions from each genome that aligned to pCP301 were  
8 concatenated to generate a 24 kb sequence for each genome. These regions were  
9 compared by constructing a maximum-likelihood phylogeny using RAxML v7.2.8 (2) that  
10 was visualized using FigTree v1.4.2 (<http://tree.bio.ed.ac.uk/software/figtree/>). The  
11 EIEC genomes are indicated by a yellow circle and *Shigella* genomes are indicated by a  
12 green circle. The EIEC lineages are indicated by blue (lineage 1), purple (lineage 2),  
13 and orange (lineage 3) squares. The scale bar indicates the distance of 0.001  
14 nucleotide substitutions per site. Bootstrap values  $\geq 50$  are designated by a grey circle.

15

16

17

18

- 19 1. **Angiuoli SV, Salzberg SL.** 2011. Mugsy: fast multiple alignment of closely  
20 related whole genomes. *Bioinformatics* **27**:334-342.
- 21 2. **Stamatakis A.** 2006. RAxML-VI-HPC: maximum likelihood-based phylogenetic  
22 analyses with thousands of taxa and mixed models. *Bioinformatics* **22**:2688-2690.

23

**Table S1.** Genomes included in the phylogenomic analysis

| Isolate ID                  | Serotype    | Molecular Serotype | Pathovar      | Phylogroup | Accession No.   |
|-----------------------------|-------------|--------------------|---------------|------------|-----------------|
| HS                          | O9          | O9:H4              | commensal     | A          | NC_009800.1     |
| H10407                      | O78:H11:K80 | O78:H11            | ETEC          | A          | FN649414.1      |
| BL21                        | NA          | O7:H-              | lab adapted   | A          | NC_012947.1     |
| K-12, BW2952                | NA          | O16:H48            | lab adapted   | A          | NC_012759.1     |
| ATCC 8739                   | NA          | O146:H20           | lab adapted   | A          | NC_010468.1     |
| <i>S. dysenteriae</i> 1012  | NA          | SD2:H14            | Shigella      | B1         | AAMJ000000000.1 |
| <i>S. dysenteriae</i> S6554 | NA          | SB1?:H45           | Shigella      | B1         | AMJS000000000.1 |
| <i>S. flexneri</i> 2a 2457T | NA          | SF2a:H14           | Shigella      | B1         | NC_004741.1     |
| <i>S. flexneri</i> 2a 301   | NA          | SF2a:H14           | Shigella      | B1         | NC_004337.2     |
| <i>S. flexneri</i> CCH060   | NA          | SF6:H45            | Shigella      | B1         | AKMW000000000.1 |
| <i>S. boydii</i> 3083-94    | NA          | SB18:H45           | Shigella      | B1         | NC_010658.1     |
| <i>S. boydii</i> ATCC 9905  | NA          | SB7:H14            | Shigella      | B1         | AERN000000000.1 |
| <i>S. sonnei</i> 046        | NA          | SS:H16             | Shigella      | B1         | NC_007384.1     |
| SE11                        | NA          | O173:H28           | commensal     | B1         | NC_011415.1     |
| 55989                       | O104:H4     | O104:H4            | EAEC          | B1         | NC_011748.1     |
| 11368                       | O26:H11     | O26:H11            | EHEC/STEC     | B1         | NC_013361.1     |
| 11128                       | O111:H-     | O111:H8            | EHEC/STEC     | B1         | NC_013364.1     |
| E110019                     | O111:H9     | O111:H9            | AEEC          | B1         | AAJW000000000.2 |
| B171                        | O111:NM     | O111:H2            | EPEC2         | B1         | AAJX000000000.2 |
| E24377A                     | O139:H28    | O139v:H28          | ETEC          | B1         | NC_009801.1     |
| B7A                         | O148:H28    | O148:H28           | ETEC          | B1         | AAJT000000000.2 |
| IAI1                        | O8          | O8/SB17:H19        | fecal isolate | B1         | NC_011741.1     |
| TY-2482                     | O104:H4     | O104:H4            | O104 outbreak | B1         | AFOG000000000.1 |
| ED1a                        | O81         | O81:H27            | commensal     | B2         | CU928162.2      |
| E2348/69                    | O127:H6     | O127:H6            | EPEC1         | B2         | NC_011601.1     |
| 536                         | O6:K15:H31  | O6:H31             | UPEC/ExPEC    | B2         | NC_008253.1     |
| S88                         | O45:K1      | O45v:H7            | UPEC/ExPEC    | B2         | NC_011742.1     |
| UTI89                       | NA          | O18:H7             | UPEC/ExPEC    | B2         | NC_007946.1     |
| CFT073                      | O6:K2:H1    | O6:H1              | UPEC/ExPEC    | B2         | AE014075.1      |
| 042                         | O44:H18     | O44:H18            | EAEC          | D          | FN554766.1      |
| UMN026                      | O17:K52:H18 | O17:H18            | UPEC/ExPEC    | D          | NC_011751.1     |
| <i>S. dysenteriae</i> 197   | NA          | SD1:H18            | Shigella      | E          | NC_007606.1     |
| EDL933                      | O157:H7     | O157:H7            | EHEC/STEC     | E          | NC_002655.2     |
| Sakai                       | O157:H7     | O157:H7            | EHEC/STEC     | E          | NC_002695.1     |
| CB9615                      | O55:H7      | O55:H7             | AEEC          | E          | NC_013941.1     |
| IA139                       | O7:K1       | O7:H45             | UPEC/ExPEC    | F          | NC_011750.1     |
| SMS_3_5                     | O19:H34     | O153:H34           | other         | F          | CP000970.1      |

NA indicates that data was not applicable or could not be determined.

**Table S2.** Predicted protein functions of EIEC genes

| LS-BSR Gene Cluster                                                  | Gene        | Predicted Protein Function                                                   |
|----------------------------------------------------------------------|-------------|------------------------------------------------------------------------------|
| <u>EIEC vs. other <i>E. coli</i> and <i>Shigella</i></u>             |             |                                                                              |
| Cluster_178041                                                       | <i>pyk</i>  | pyruvate kinase                                                              |
| Cluster_178088                                                       |             | putative membrane protein                                                    |
| Cluster_178120                                                       |             | carboxymuconolactone decarboxylase family protein                            |
| Cluster_179012                                                       |             | hypothetical protein                                                         |
| Cluster_181725                                                       |             | hypothetical protein                                                         |
| Cluster_183530                                                       |             | dihydrouridine synthase family protein                                       |
| Cluster_186711                                                       | <i>torT</i> | TMAO reductase system periplasmic protein TorT                               |
| <u>EIEC vs. other <i>E. coli</i> (not including <i>Shigella</i>)</u> |             |                                                                              |
| Cluster_16689                                                        |             | 4Fe-4S dicluster domain protein                                              |
| Cluster_171880                                                       |             | hypothetical protein                                                         |
| Cluster_171882                                                       |             | conjugal transfer/type IV secretion DotA/TraY family protein                 |
| Cluster_171887                                                       |             | hypothetical protein                                                         |
| Cluster_167621                                                       |             | phage-related minor tail family protein                                      |
| Cluster_168446                                                       |             | enterobacterial exodeoxyribonuclease VIII family protein                     |
| Cluster_168480                                                       |             | phage major capsid protein, HK97 family                                      |
| Cluster_168972                                                       |             | hypothetical protein                                                         |
| Cluster_168973                                                       |             | hypothetical protein                                                         |
| Cluster_169741                                                       |             | bacteriophage CI repressor helix-turn-helix domain protein                   |
| Cluster_169827                                                       |             | metallo-beta-lactamase superfamily protein                                   |
| Cluster_170182                                                       |             | hypothetical protein                                                         |
| Cluster_173349                                                       |             | phage gp6-like head-tail connector family protein                            |
| Cluster_175432                                                       |             | hypothetical protein                                                         |
| Cluster_175571                                                       | <i>rpoZ</i> | DNA-directed RNA polymerase, omega subunit                                   |
| Cluster_168990                                                       |             | hypothetical protein                                                         |
| Cluster_168992                                                       |             | hypothetical protein                                                         |
| Cluster_168993                                                       |             | hypothetical protein                                                         |
| Cluster_168995                                                       |             | hypothetical protein                                                         |
| Cluster_168997                                                       |             | hypothetical protein                                                         |
| Cluster_169044                                                       |             | glycosyl transferase 2 family protein                                        |
| Cluster_169048                                                       |             | glycosyl transferase 2 family protein                                        |
| Cluster_169049                                                       |             | CDP-Glycerol:Poly(glycerophosphate) glycerophosphotransferase family protein |
| Cluster_169935                                                       |             | oxidoreductase family, C-terminal alpha/beta domain protein                  |
| Cluster_169939                                                       |             | D5 N terminal like family protein                                            |
| Cluster_169940                                                       |             | conserved hypothetical protein                                               |
| Cluster_170184                                                       |             | integrating conjugative element , PFL_4695 family domain protein             |
| Cluster_170187                                                       |             | hypothetical protein                                                         |
| Cluster_170188                                                       |             | response regulator                                                           |
| Cluster_170194                                                       |             | conserved hypothetical family protein                                        |
| Cluster_170195                                                       | <i>ssb</i>  | single-stranded DNA-binding family protein                                   |
| Cluster_171910                                                       |             | type IV leader peptidase family protein                                      |
| Cluster_171911                                                       |             | transglycosylase SLT domain protein                                          |
| Cluster_178041                                                       | <i>pyk</i>  | pyruvate kinase                                                              |
| Cluster_178069                                                       |             | kinase/pyrophosphorylase family protein                                      |
| Cluster_178088                                                       |             | putative membrane protein                                                    |

|                |             |                                                                    |
|----------------|-------------|--------------------------------------------------------------------|
| Cluster_178120 |             | carboxymuconolactone decarboxylase family protein                  |
| Cluster_169052 | <i>galE</i> | UDP-glucose 4-epimerase GalE                                       |
| Cluster_170093 |             | hypothetical protein                                               |
| Cluster_170303 |             | arylsulfotransferase family protein                                |
| Cluster_170304 |             | DSBA-like thioredoxin domain protein                               |
| Cluster_170515 |             | conserved hypothetical protein                                     |
| Cluster_170570 |             | hypothetical protein                                               |
| Cluster_17062  |             | hypothetical protein                                               |
| Cluster_170665 |             | hypothetical protein                                               |
| Cluster_1707   |             | flxA-like family protein                                           |
| Cluster_170798 |             | fimbrial family protein                                            |
| Cluster_170859 |             | haemagglutinin family protein                                      |
| Cluster_171074 |             | SIS domain protein                                                 |
| Cluster_1711   |             | methyltransferase domain protein                                   |
| Cluster_171226 | <i>btuB</i> | tonB-dependent vitamin B12 receptor                                |
| Cluster_171408 |             | methyltransferase domain protein                                   |
| Cluster_171424 |             | transposase IS66 family protein                                    |
| Cluster_171433 |             | hypothetical protein                                               |
| Cluster_171446 |             | oligogalacturonate-specific porin family protein                   |
| Cluster_171449 |             | FCD domain protein                                                 |
| Cluster_171915 |             | antitoxin Phd_YefM, type II toxin-antitoxin system family protein  |
| Cluster_171916 |             | addiction module toxin, RelE/StbE family protein                   |
| Cluster_171917 |             | type IV pilus biogenesis family protein                            |
| Cluster_171918 |             | pilin accessory family protein                                     |
| Cluster_171919 |             | type IVB pilus formation outer membrane protein, R64 PilN family   |
| Cluster_171920 |             | pilM family protein                                                |
| Cluster_171923 |             | putative membrane protein                                          |
| Cluster_172064 | <i>sfsA</i> | sugar fermentation stimulation protein                             |
| Cluster_17208  |             | fimbrial family protein                                            |
| Cluster_17209  |             | fimbrial family protein                                            |
| Cluster_17212  |             | fimbrial family protein                                            |
| Cluster_17213  | <i>folK</i> | 2-amino-4-hydroxy-6-hydroxymethyldihydropteridine diphosphokinase  |
| Cluster_172174 |             | phosphoribosyl transferase domain protein                          |
| Cluster_172190 |             | hypothetical protein                                               |
| Cluster_172200 |             | hypothetical protein                                               |
| Cluster_172206 |             | Ash family protein                                                 |
| Cluster_175612 |             | type III secretion apparatus protein, YscI/HrpB, C-terminal domain |
| Cluster_175616 |             | type III secretion low calcium response chaperone LcrH/SycD        |
| Cluster_176582 |             | phage gp6-like head-tail connector family protein                  |
| Cluster_179011 |             | terminase small subunit                                            |
| Cluster_179012 |             | hypothetical protein                                               |
| Cluster_170112 |             | description family protein                                         |
| Cluster_170113 |             | conserved hypothetical protein                                     |
| Cluster_1723   |             | hypothetical protein                                               |
| Cluster_172355 |             | plasmid stabilisation system family protein                        |
| Cluster_178247 |             | YecM family protein                                                |
| Cluster_176594 |             | phage baseplate assembly V family protein                          |
| Cluster_179014 |             | hypothetical protein                                               |
| Cluster_173627 |             | hypothetical protein                                               |

|                |             |                                                             |
|----------------|-------------|-------------------------------------------------------------|
| Cluster_178285 |             | RNA polymerase sigma factor, sigma-70 family protein        |
| Cluster_181210 |             | bacterial mobilization family protein                       |
| Cluster_181725 |             | hypothetical protein                                        |
| Cluster_172738 |             | PTS system sugar-specific permease component family protein |
| Cluster_181221 |             | hypothetical protein                                        |
| Cluster_183530 |             | dihydrouridine synthase family protein                      |
| Cluster_183668 |             | hypothetical protein                                        |
| Cluster_183746 |             | efflux pump membrane family protein                         |
| Cluster_183764 |             | phosphotransferase system, EIIc family protein              |
| Cluster_18658  |             | phage integrase family protein                              |
| Cluster_186711 | <i>torT</i> | TMAO reductase system periplasmic protein TorT              |

EIEC and *Shigella* vs. other *E. coli*

|                |             |                                                                              |
|----------------|-------------|------------------------------------------------------------------------------|
| Cluster_16689  |             | 4Fe-4S dicluster domain protein                                              |
| Cluster_167621 |             | phage-related minor tail family protein                                      |
| Cluster_168446 |             | enterobacterial exodeoxyribonuclease VIII family protein                     |
| Cluster_168480 |             | phage major capsid protein, HK97 family                                      |
| Cluster_168972 |             | hypothetical protein                                                         |
| Cluster_168973 |             | hypothetical protein                                                         |
| Cluster_168990 |             | hypothetical protein                                                         |
| Cluster_168992 |             | hypothetical protein                                                         |
| Cluster_168993 |             | hypothetical protein                                                         |
| Cluster_168995 |             | hypothetical protein                                                         |
| Cluster_168997 |             | hypothetical protein                                                         |
| Cluster_169044 |             | glycosyl transferase 2 family protein                                        |
| Cluster_169048 |             | glycosyl transferase 2 family protein                                        |
| Cluster_169049 |             | CDP-Glycerol:Poly(glycerophosphate) glycerophosphotransferase family protein |
| Cluster_169052 | <i>galE</i> | UDP-glucose 4-epimerase GalE                                                 |
| Cluster_169741 |             | bacteriophage CI repressor helix-turn-helix domain protein                   |
| Cluster_169827 |             | metallo-beta-lactamase superfamily protein                                   |
| Cluster_169935 |             | oxidoreductase family, C-terminal alpha/beta domain protein                  |
| Cluster_169939 |             | D5 N terminal like family protein                                            |
| Cluster_169940 |             | conserved hypothetical protein                                               |
| Cluster_170093 |             | hypothetical protein                                                         |
| Cluster_170112 |             | description family protein                                                   |
| Cluster_170113 |             | conserved hypothetical protein                                               |
| Cluster_170182 |             | hypothetical protein                                                         |
| Cluster_170184 |             | integrating conjugative element , PFL_4695 family domain protein             |
| Cluster_170187 |             | hypothetical protein                                                         |
| Cluster_170188 |             | response regulator                                                           |
| Cluster_170194 |             | conserved hypothetical family protein                                        |
| Cluster_170195 | <i>ssb</i>  | single-stranded DNA-binding family protein                                   |
| Cluster_170303 |             | arylsulfotransferase family protein                                          |
| Cluster_170304 |             | DSBA-like thioredoxin domain protein                                         |
| Cluster_170515 |             | conserved hypothetical protein                                               |
| Cluster_170570 |             | hypothetical protein                                                         |
| Cluster_17062  |             | hypothetical protein                                                         |
| Cluster_170665 |             | hypothetical protein                                                         |
| Cluster_1707   |             | flxA-like family protein                                                     |

|                |             |                                                                    |
|----------------|-------------|--------------------------------------------------------------------|
| Cluster_170798 |             | fimbrial family protein                                            |
| Cluster_170859 |             | haemagglutinin family protein                                      |
| Cluster_171074 |             | SIS domain protein                                                 |
| Cluster_1711   |             | methyltransferase domain protein                                   |
| Cluster_171226 | <i>btuB</i> | tonB-dependent vitamin B12 receptor                                |
| Cluster_171408 |             | methyltransferase domain protein                                   |
| Cluster_171424 |             | transposase IS66 family protein                                    |
| Cluster_171433 |             | hypothetical protein                                               |
| Cluster_171446 |             | oligogalacturonate-specific porin family protein                   |
| Cluster_171449 |             | FCD domain protein                                                 |
| Cluster_171880 |             | hypothetical protein                                               |
| Cluster_171882 |             | conjugal transfer/type IV secretion DotA/TraY family protein       |
| Cluster_171887 |             | hypothetical protein                                               |
| Cluster_171910 |             | type IV leader peptidase family protein                            |
| Cluster_171911 |             | transglycosylase SLT domain protein                                |
| Cluster_171915 |             | antitoxin Phd_YefM, type II toxin-antitoxin system family protein  |
| Cluster_171916 |             | addiction module toxin, RelE/StbE family protein                   |
| Cluster_171917 |             | type IV pilus biogenesis family protein                            |
| Cluster_171918 |             | pilin accessory family protein                                     |
| Cluster_171919 |             | type IVB pilus formation outer membrane protein, R64 PilN family   |
| Cluster_171920 |             | pilM family protein                                                |
| Cluster_171923 |             | putative membrane protein                                          |
| Cluster_172064 | <i>sfsA</i> | sugar fermentation stimulation protein                             |
| Cluster_17208  |             | fimbrial family protein                                            |
| Cluster_17209  |             | fimbrial family protein                                            |
| Cluster_17212  |             | fimbrial family protein                                            |
| Cluster_17213  | <i>folK</i> | 2-amino-4-hydroxy-6-hydroxymethyldihydropteridine diphosphokinase  |
| Cluster_172174 |             | phosphoribosyl transferase domain protein                          |
| Cluster_172190 |             | hypothetical protein                                               |
| Cluster_172200 |             | hypothetical protein                                               |
| Cluster_172206 |             | ash family protein                                                 |
| Cluster_1723   |             | hypothetical protein                                               |
| Cluster_172355 |             | plasmid stabilisation system family protein                        |
| Cluster_172738 |             | PTS system sugar-specific permease component family protein        |
| Cluster_173349 |             | phage gp6-like head-tail connector family protein                  |
| Cluster_173627 |             | hypothetical protein                                               |
| Cluster_175432 |             | hypothetical protein                                               |
| Cluster_175571 | <i>rpoZ</i> | DNA-directed RNA polymerase, omega subunit                         |
| Cluster_175612 |             | type III secretion apparatus protein, YscI/HrpB, C-terminal domain |
| Cluster_175616 |             | type III secretion low calcium response chaperone LcrH/SycD        |
| Cluster_176582 |             | phage gp6-like head-tail connector family protein                  |
| Cluster_176594 |             | phage baseplate assembly V family protein                          |
| Cluster_178041 | <i>pyk</i>  | pyruvate kinase                                                    |
| Cluster_178069 |             | kinase/pyrophosphorylase family protein                            |
| Cluster_178088 |             | putative membrane protein                                          |
| Cluster_178120 |             | carboxymuconolactone decarboxylase family protein                  |
| Cluster_178247 |             | YecM family protein                                                |
| Cluster_178285 |             | RNA polymerase sigma factor, sigma-70 family protein               |
| Cluster_179011 |             | terminase small subunit                                            |

Cluster\_179012  
Cluster\_179014

hypothetical protein  
hypothetical protein

---



**Table S3.** Predicted protein functions of EIEC clade-specific genes

| LS-BSR Gene Cluster | Gene        | Predicted Protein Function                           |
|---------------------|-------------|------------------------------------------------------|
| <b>Clade 1</b>      |             |                                                      |
| Cluster_171822      |             | ABC transporter family protein                       |
| Cluster_171824      |             | transposase family protein                           |
| Cluster_171826      |             | colicin pore forming domain protein                  |
| Cluster_171827      |             | colicin E1 (microcin) immunity family protein        |
| Cluster_173138      |             | UreE urease accessory , C-terminal domain protein    |
| Cluster_174773      |             | hypothetical protein                                 |
| Cluster_174373      |             | fimbrial family protein                              |
| Cluster_174374      |             | PapC C-terminal domain protein                       |
| Cluster_174375      |             | fimbrial family protein                              |
| Cluster_174408      |             | ribosome inactivating family protein                 |
| Cluster_174512      |             | bacterial transcriptional regulator family protein   |
| Cluster_174580      |             | hypothetical protein                                 |
| Cluster_174582      |             | gene 9 domain protein                                |
| Cluster_17470       | <i>ribH</i> | 6,7-dimethyl-8-ribityllumazine synthase              |
| Cluster_174762      |             | hypothetical protein                                 |
| Cluster_176485      |             | methyltransferase domain protein                     |
| Cluster_177135      |             | hypothetical protein                                 |
| Cluster_177152      |             | UbiE/COQ5 methyltransferase family protein           |
| Cluster_17865       |             | glutathione S-transferase, C-terminal domain protein |
| Cluster_178767      |             | tetratricopeptide repeat family protein              |
| Cluster_178830      |             | fimbrial family protein                              |
| Cluster_178850      |             | coA-transferase III family protein                   |
| Cluster_178852      | <i>oxc</i>  | oxalyl-CoA decarboxylase                             |
| Cluster_17886       |             | hypothetical protein                                 |
| Cluster_178585      |             | FGGY-pentulose kinase family protein                 |
| Cluster_178533      |             | glycosyl transferases group 1 family protein         |
| Cluster_178576      |             | HAD hydrolase, IA, variant 1 family protein          |
| Cluster_179214      |             | hypothetical protein                                 |
| Cluster_179207      |             | hypothetical protein                                 |
| Cluster_180728      |             | hypothetical protein                                 |
| Cluster_180729      |             | competence CoiA-like family protein                  |
| Cluster_180732      |             | hypothetical protein                                 |
| Cluster_180737      |             | helix-turn-helix domain protein                      |
| Cluster_180738      |             | hypothetical protein                                 |
| Cluster_180727      |             | hypothetical protein                                 |
| Cluster_180726      |             | conserved hypothetical protein                       |
| Cluster_180680      |             | bacterial DNA-binding family protein                 |
| Cluster_181364      |             | RelB antitoxin family protein                        |
| Cluster_181369      |             | conserved hypothetical protein                       |
| Cluster_181372      |             | hypothetical protein                                 |
| Cluster_181375      |             | hypothetical protein                                 |
| Cluster_181376      |             | resolvase, N terminal domain protein                 |
| Cluster_181377      |             | conserved hypothetical protein                       |
| Cluster_181379      |             | hypothetical protein                                 |
| Cluster_181380      |             | outer membrane efflux family protein                 |
| Cluster_181359      |             | DNA methylase family protein                         |
| Cluster_181363      |             | putative membrane protein                            |

|                |             |                                                                                    |
|----------------|-------------|------------------------------------------------------------------------------------|
| Cluster_181355 |             | transposase IS116/IS110/IS902 family protein                                       |
| Cluster_181347 |             | PAS fold family protein                                                            |
| Cluster_183234 |             | SIS domain protein                                                                 |
| Cluster_183235 | <i>pyk</i>  | pyruvate kinase                                                                    |
| Cluster_183237 |             | opacity-associated A LysM-like domain protein                                      |
| Cluster_18297  |             | biofilm development YmgB/AriR family protein                                       |
| Cluster_182952 |             | helix-turn-helix domain protein                                                    |
| Cluster_184798 |             | putative membrane protein                                                          |
| Cluster_184808 |             | periplasmic binding protein-like domain protein                                    |
| Cluster_184859 |             | InaA N-terminal domain protein                                                     |
| Cluster_184884 |             | RND transporter, hydrophobe/amphiphile efflux-1 family protein                     |
| Cluster_184888 |             | cytochrome c family protein                                                        |
| Cluster_184908 |             | binding-protein-dependent transport system inner membrane component family protein |
| Cluster_185221 |             | hypothetical protein                                                               |
| Cluster_185250 |             | formate dehydrogenase family accessory protein FdhD                                |
| Cluster_185308 |             | glycyl-radical enzyme activating family protein                                    |
| Cluster_18561  |             | binding-protein-dependent transport system inner membrane component family protein |
| Cluster_185625 |             | HNH endonuclease family protein                                                    |
| Cluster_185662 |             | conserved hypothetical family protein                                              |
| Cluster_18465  | <i>pgmB</i> | beta-phosphoglucomutase                                                            |
| Cluster_184656 | <i>fmt</i>  | methionyl-tRNA formyltransferase                                                   |
| Cluster_184619 |             | ribonuclease, Rne/Rng family domain protein                                        |
| Cluster_184624 |             | diguanylate cyclase domain protein                                                 |
| Cluster_187913 | <i>ubiG</i> | 3-demethylubiquinone-9 3-O-methyltransferase                                       |
| Cluster_187956 |             | NADH dehydrogenase family protein                                                  |
| Cluster_18798  |             | DeoC/LacD aldolase family protein                                                  |
| Cluster_188215 |             | caudovirales tail fiber assembly family protein                                    |
| Cluster_188216 |             | hypothetical protein                                                               |
| Cluster_187732 |             | polysaccharide pyruvyl transferase family protein                                  |
| Cluster_191020 |             | polysaccharide biosynthesis family protein                                         |
| Cluster_191023 |             | hypothetical protein                                                               |
| Cluster_191024 |             | hypothetical protein                                                               |
| Cluster_191027 |             | glycosyl transferase 2 family protein                                              |
| Cluster_191028 |             | mannose-1-phosphate guanylyltransferase/mannose-6-phosphate isomerase              |
| Cluster_191061 |             | hypothetical protein                                                               |
| Cluster_191062 |             | hypothetical protein                                                               |
| Cluster_191085 |             | hypothetical protein                                                               |
| Cluster_191382 |             | KR domain protein                                                                  |
| Cluster_191530 |             | conserved hypothetical protein                                                     |
| Cluster_190944 |             | WGR domain protein                                                                 |
| Cluster_190926 |             | outer membrane beta-barrel domain protein                                          |
| Cluster_193389 |             | DctM-like transporters family protein                                              |
| Cluster_193410 |             | PapG carbohydrate binding domain protein                                           |
| Cluster_193450 | <i>neuC</i> | UDP-N-acetyl-D-glucosamine 2-epimerase, UDP-hydrolysing                            |
| Cluster_193451 |             | GDSL-like Lipase/Acylhydrolase family protein                                      |
| Cluster_193754 |             | branched-chain amino acid transport system/ permease component family protein      |
| Cluster_193756 |             | periplasmic binding and sugar binding domain of Lacl family protein                |
| Cluster_193912 |             | putative membrane protein                                                          |
| Cluster_194039 |             | hypothetical protein                                                               |
| Cluster_194075 |             | conserved hypothetical protein                                                     |
| Cluster_194123 |             | haemagglutinin family protein                                                      |

|                |             |                                                                             |
|----------------|-------------|-----------------------------------------------------------------------------|
| Cluster_193182 |             | KDPG and KHG aldolase family protein                                        |
| Cluster_197538 |             | hypothetical protein                                                        |
| Cluster_197540 |             | mannose-1-phosphate guanylyltransferase/mannose-6-phosphate isomerase       |
| Cluster_197305 |             | BRO family, N-terminal domain protein                                       |
| Cluster_197316 |             | hypothetical protein                                                        |
| Cluster_203828 |             | conserved hypothetical protein                                              |
| Cluster_203846 |             | type II secretion system (T2SS), K family protein                           |
| Cluster_203867 |             | hypothetical protein                                                        |
| Cluster_203873 |             | hypothetical protein                                                        |
| Cluster_203875 |             | hypothetical protein                                                        |
| Cluster_203905 |             | YcfA-like family protein                                                    |
| Cluster_203927 |             | HMGL-like family protein                                                    |
| Cluster_203944 |             | conserved hypothetical protein                                              |
| Cluster_204129 |             | prokaryotic DksA/TraR C4-type zinc finger family protein                    |
| Cluster_204133 |             | putative peptidoglycan domain protein                                       |
| Cluster_203574 |             | Major Facilitator Superfamily protein                                       |
| Cluster_203598 |             | hypothetical protein                                                        |
| Cluster_20672  | <i>hisF</i> | imidazoleglycerol phosphate synthase, cyclase subunit                       |
| Cluster_206720 |             | acyl-CoA reductase family protein                                           |
| Cluster_20675  | <i>hisB</i> | histidinol-phosphatase                                                      |
| Cluster_206757 |             | hypothetical protein                                                        |
| Cluster_20677  | <i>hisD</i> | histidinol dehydrogenase                                                    |
| Cluster_20678  | <i>hisG</i> | ATP phosphoribosyltransferase                                               |
| Cluster_206784 |             | hypothetical protein                                                        |
| Cluster_206797 |             | hypothetical protein                                                        |
| Cluster_207165 |             | Gram-negative porin family protein                                          |
| Cluster_207229 |             | cobinamide kinase / cobinamide phosphate guanylyltransferase family protein |
| Cluster_207285 | <i>gnd</i>  | 6-phosphogluconate dehydrogenase                                            |
| Cluster_207289 |             | N-terminal domain of galactosyltransferase family protein                   |
| Cluster_207292 |             | 3-beta hydroxysteroid dehydrogenase/isomerase family protein                |
| Cluster_207293 | <i>rfbC</i> | dTDP-4-dehydrorhamnose 3,5-epimerase                                        |
| Cluster_207294 | <i>rfbB</i> | dTDP-glucose 4,6-dehydratase                                                |
| Cluster_207343 |             | phage tail tape measure protein, TP901 family, core region                  |
| Cluster_207358 |             | P2 phage tail completion R family protein                                   |
| Cluster_207396 |             | nucleoside transporter family protein                                       |
| Cluster_20746  |             | prokaryotic cytochrome b561 family protein                                  |
| Cluster_207650 |             | hypothetical protein                                                        |
| Cluster_207652 |             | conserved hypothetical protein                                              |
| Cluster_207676 |             | NinF family protein                                                         |
| Cluster_207677 |             | conserved hypothetical protein                                              |
| Cluster_207681 |             | hypothetical protein                                                        |
| Cluster_207694 |             | hypothetical protein                                                        |
| Cluster_207699 |             | hypothetical protein                                                        |
| Cluster_207748 | <i>ptsP</i> | phosphoenolpyruvate-protein phosphotransferase                              |
| Cluster_207820 | <i>xseA</i> | exodeoxyribonuclease VII, large subunit                                     |
| Cluster_207827 | <i>yfgL</i> | outer membrane assembly lipoprotein YfgL                                    |
| Cluster_207845 | <i>iscS</i> | cysteine desulfurase IscS                                                   |
| Cluster_207922 | <i>ffh</i>  | signal recognition particle protein                                         |
| Cluster_207935 |             | phage tail tape measure protein, TP901 family, core region                  |
| Cluster_207939 |             | caudovirales tail fibre assembly family protein                             |
| Cluster_207945 |             | AIPR family protein                                                         |

Cluster\_207946 phage virion morphogenesis protein  
Cluster\_207948 phage lysis regulatory, LysB family protein  
Cluster\_207959 hypothetical protein  
Cluster\_207961 hypothetical protein  
Cluster\_207966 conserved hypothetical protein  
Cluster\_207970 hypothetical protein

### Clade 2

Cluster\_171845 hypothetical protein  
Cluster\_171850 hypothetical protein  
Cluster\_174308 mannose-1-phosphate guanylyltransferase/mannose-6-phosphate isomerase  
Cluster\_176267 IstB-like ATP binding family protein  
Cluster\_176265 ToIA C-terminal family protein  
Cluster\_193388 tripartite ATP-independent periplasmic transporters, DctQ component family protein  
Cluster\_193436 *iutA* ferric aerobactin receptor  
Cluster\_193448 alpha-2,8-polysialyltransferase family protein  
Cluster\_197534 putative membrane protein  
Cluster\_197545 glycosyl transferases group 1 family protein  
Cluster\_203862 hypothetical protein  
Cluster\_20700 hypothetical protein

### Clade 3

Cluster\_181381 hypothetical protein  
Cluster\_183353 hypothetical protein  
Cluster\_188221 hypothetical protein  
Cluster\_197682 LysR substrate binding domain protein  
Cluster\_197733 conserved hypothetical protein  
Cluster\_197619 hypothetical protein  
Cluster\_197635 response regulator  
Cluster\_204204 bacterial flagellin C-terminal helical region family protein  
Cluster\_208196 PGAP1-like family protein  
Cluster\_208198 hypothetical protein  
Cluster\_208008 hypothetical protein  
Cluster\_212088 hypothetical protein  
Cluster\_212334 conserved hypothetical protein

---
